# Supplementary material for: What controls the stable isotope composition of precipitation in the Asian monsoon region?
Source: Copernicus journal article supplement (doi:10.5194/hess-2017-164), 2017-03-29
Supplement: Supplementary file 1 [file hess-2017-164-supplement.pdf]

# Supplement for “What controls the stable isotope composition of precipitation in the Asian monsoon region?”

Nguyen Le Duy<sup>1,2</sup>, Hanno Meyer<sup>3</sup>, Ingo Heidbüchel<sup>1</sup>, Bruno Merz<sup>1,4</sup>, Heiko Apel<sup>1</sup>

<sup>1</sup>GFZ German Research Centre for Geosciences, Section 5.4 – Hydrology, Potsdam, Germany

<sup>2</sup>SIWRR Southern Institute of Water Resources Research, Ho Chi Minh City, Vietnam

<sup>3</sup>Alfred Wegener Institute for Polar and Marine Research, Research Unit Potsdam, Germany

<sup>4</sup>University Potsdam, Institute of Earth and Environmental Science, Germany

Correspondence to: Nguyen Le Duy ([duy@gfz-potsdam.de](mailto:duy@gfz-potsdam.de))

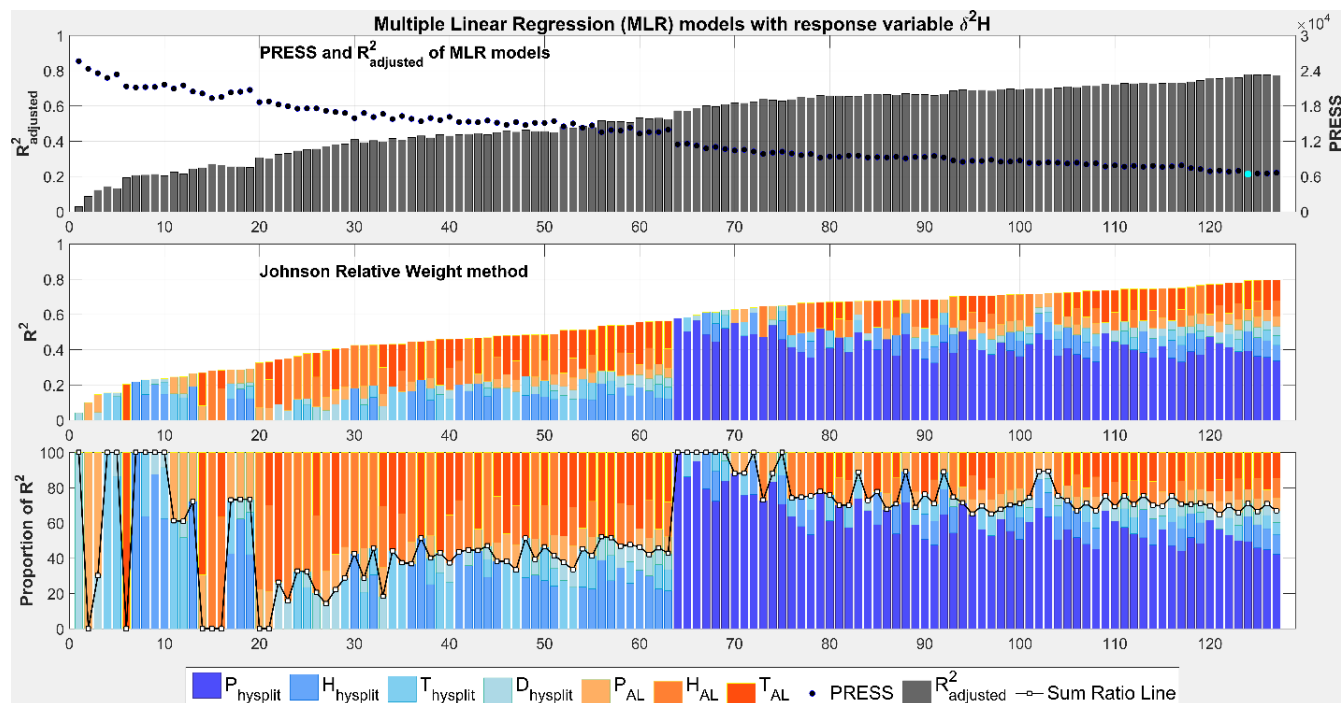

**Figure S1: MLR with response variable  $\delta^2\text{H}$  and relative importance analysis applied for all possible subsets. The 127 MLR models are sorted according to their  $R^2$  values in ascendant order. Colors represent the relative contribution (in %) of the predictors. The sum ratio line separates the role of local (in red and orange) and regional (in blue) factors. PRESS and adjusted  $R^2$  values indicate the quality of the MLR model. The best MLR model depicted by the lowest PRESS (model 124, highlighted by the cyan dot) explains 79% of the  $\delta^2\text{H}$  variation ( $R^2 = 0.79$ ).**

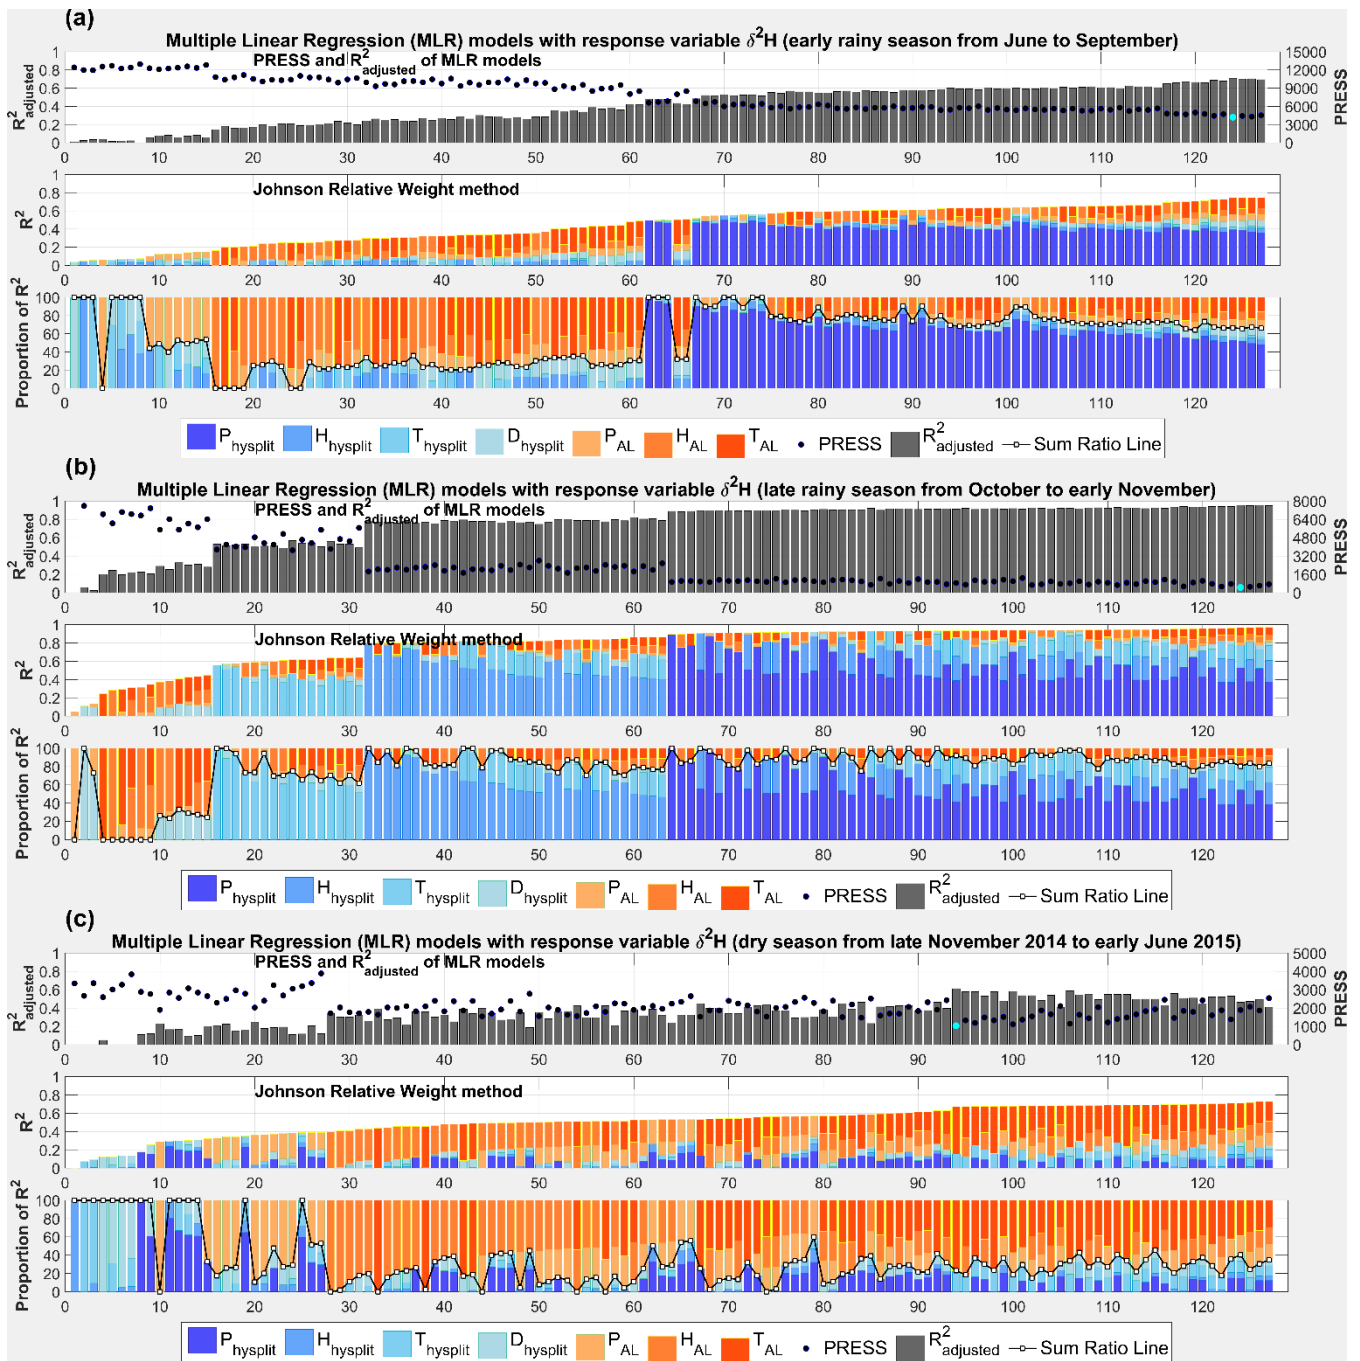

Figure S2: MLR with response variable  $\delta^2\text{H}$  and relative importance analysis applied for all possible subsets (127 MLR models) for different seasons: a) early monsoon from June to September, b) late monsoon from October to mid-November, and c) the dry season from mid-November to mid-June.

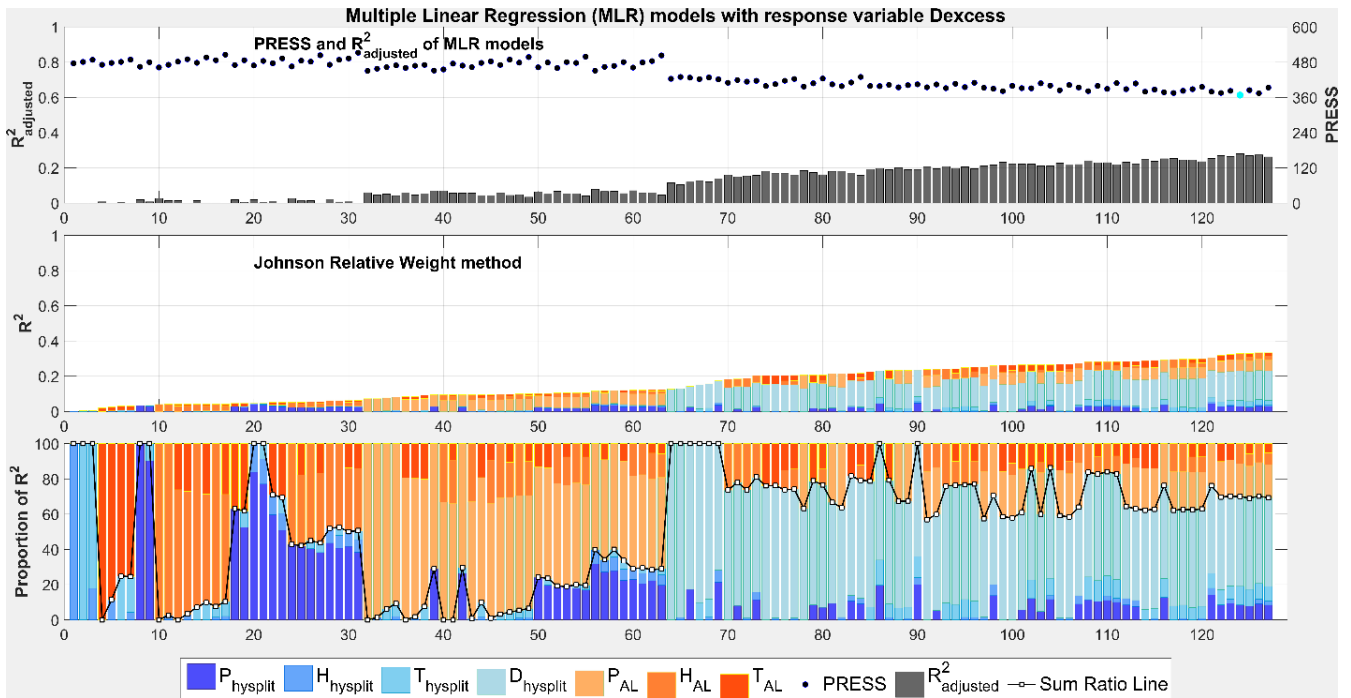

**Figure S3: MLR with response variable d-excess and relative importance analysis applied for all possible subsets. The 127 MLR models are sorted according to their  $R^2$  values in ascendant order. Colors represent the relative contribution (in %) of the predictors. The sum ratio line separates the role of local (in red and orange) and regional (in blue) factors. PRESS and adjusted  $R^2$  values indicate the quality of the MLR model. The best MLR model depicted by the lowest PRESS (model 124, highlighted by the cyan dot) explains 30% of the d-excess variation ( $R^2 = 0.3$ ).**

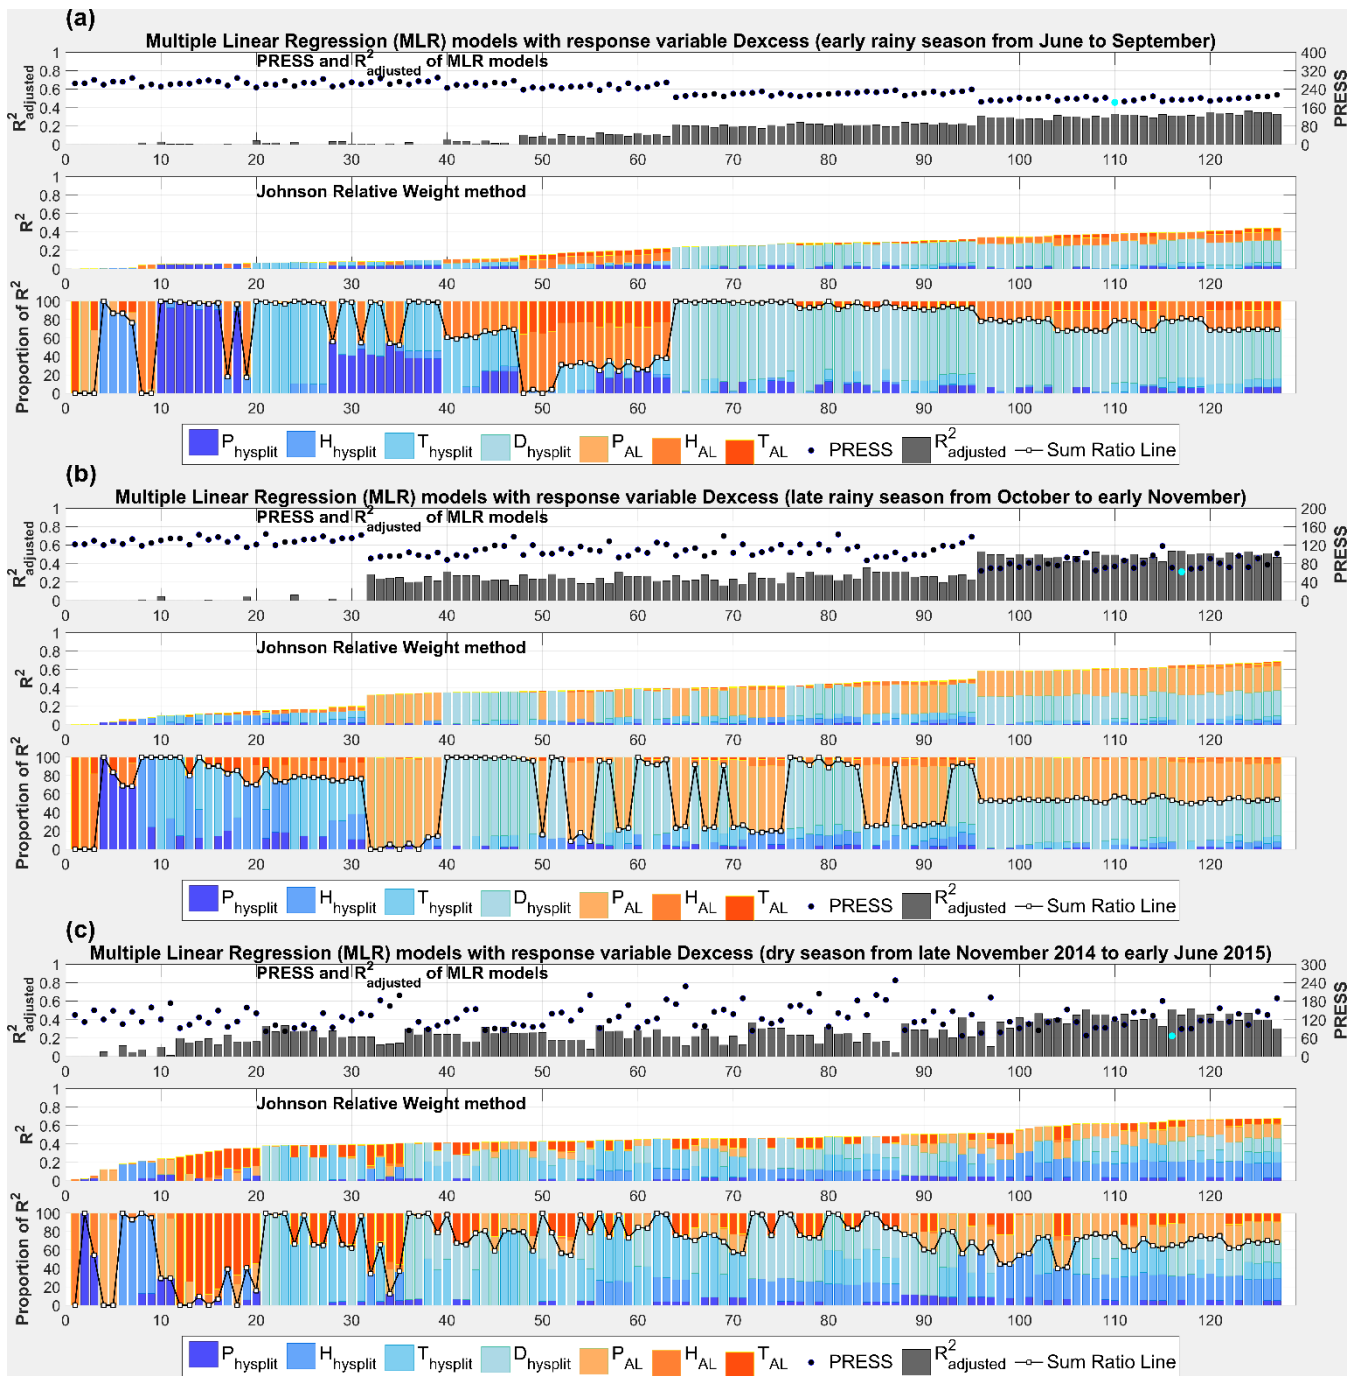

Figure S4: MLR with response variable d-excess and relative importance analysis applied for all possible subsets (127 MLR models) for different seasons: a) early monsoon from June to September, b) late monsoon from October to mid-November, and c) the dry season from mid-November to mid-June.
